# Supplementary material
Source: Springer Nature journal article supplement (https://www.springermedizin.de/resource/supplementary/12985_2010_1145_MOESM3_ESM.pdf/9609724)

**A**

160 170 180 190 200 210  
A G A C A A C A C T A C T A A G G C T T C T T T G G G A G G G G G A A G T A G G G A T A G G T A A G A G G

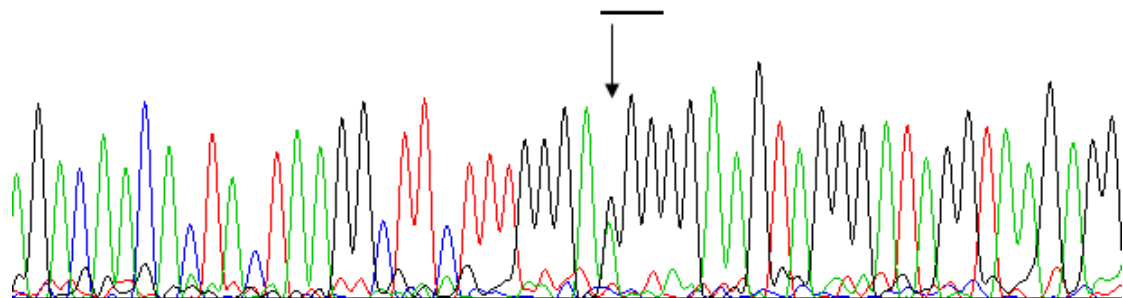**B**

50 60 70 80 90 100  
T T C C T C T T A C C T A T C C C T A C T T C C C C C T C C C A A A G A A G C C T T A G T A G T G T T G

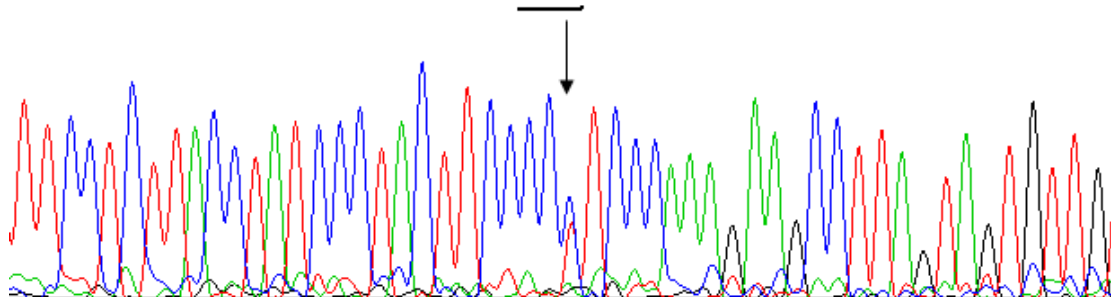

Supplement: MOESM3 [file 9609724]
